# Supplementary material for: Combined Immunotherapy with Chemotherapy versus Bevacizumab with Chemotherapy in First-Line Treatment of Driver-Gene-Negative Non-Squamous Non-Small Cell Lung Cancer: An Updated Systematic Review and Network Meta-Analysis
Source: MDPI journal article supplement (doi:10.3390/jcm11061655), 2022-03-16
Supplement: s1 [file s1]

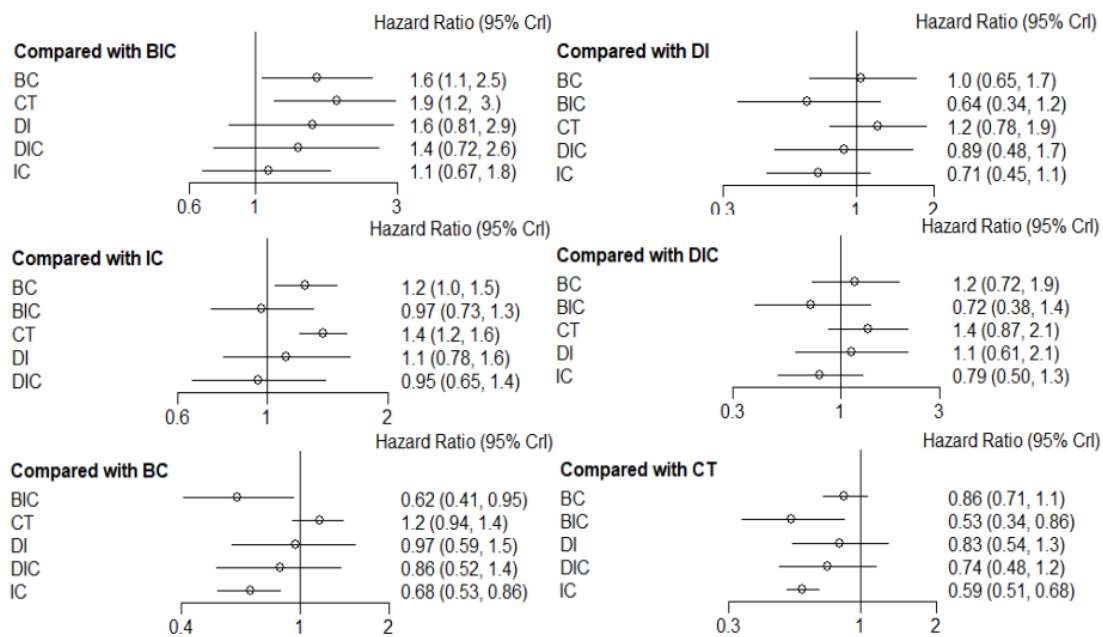

Supplemental Figure S3. Forest plot of hazard ratios (HRs) for PFS in NMA.

Abbreviation: CrI: confidence interval
