# Supplementary material for: Combined Immunotherapy with Chemotherapy versus Bevacizumab with Chemotherapy in First-Line Treatment of Driver-Gene-Negative Non-Squamous Non-Small Cell Lung Cancer: An Updated Systematic Review and Network Meta-Analysis
Source: MDPI journal article supplement (doi:10.3390/jcm11061655), 2022-03-16
Supplement: s1 [file s1]

**Supplemental Table S3:** Rank probabilities with SUCRA value for different outcomes in 6 kinds of first-line treatments for subgroup patients with non-squamous NSCLC.

| <b>OS of patients with ECOG = 0</b>  |       |       |       |       |   |   |               |
|--------------------------------------|-------|-------|-------|-------|---|---|---------------|
| Treatment                            | Rank1 | Rank2 | Rank3 | Rank4 | - | - | SUCRA         |
| IC                                   | 0.21  | 0.30  | 0.25  | 0.23  | - | - | 0.4969        |
| BC                                   | 0.04  | 0.42  | 0.35  | 0.19  | - | - | 0.4353        |
| BIC                                  | 0.73  | 0.17  | 0.06  | 0.05  | - | - | <b>0.8695</b> |
| DIC                                  | -     | -     | -     | -     | - | - | -             |
| DI                                   | -     | -     | -     | -     | - | - | -             |
| CT                                   | 0.02  | 0.11  | 0.34  | 0.53  | - | - | 0.2083        |
| <b>PFS of patients with ECOG = 0</b> |       |       |       |       |   |   |               |
| Treatment                            | Rank1 | Rank2 | Rank3 | -     | - | - | SUCRA         |
| IC                                   | 0.19  | 0.81  | 0.00  | -     | - | - | 0.5944        |
| BC                                   | 0.81  | 0.19  | 0.00  | -     | - | - | <b>0.9030</b> |
| BIC                                  | -     | -     | -     | -     | - | - | -             |
| DIC                                  | -     | -     | -     | -     | - | - | -             |
| DI                                   | -     | -     | -     | -     | - | - | -             |
| CT                                   | 0.00  | 0.00  | 0.99  | -     | - | - | 0.0025        |
| <b>OS of patients with ECOG = 1</b>  |       |       |       |       |   |   |               |
| Treatment                            | Rank1 | Rank2 | Rank3 | Rank4 | - | - | SUCRA         |
| IC                                   | 0.25  | 0.19  | 0.36  | 0.20  | - | - | 0.4962        |
| BC                                   | 0.23  | 0.50  | 0.23  | 0.03  | - | - | 0.6415        |
| BIC                                  | 0.51  | 0.25  | 0.14  | 0.11  | - | - | <b>0.7176</b> |
| DIC                                  | -     | -     | -     | -     | - | - | -             |
| DI                                   | -     | -     | -     | -     | - | - | -             |
| CT                                   | 0.01  | 0.06  | 0.27  | 0.65  | - | - | 0.1447        |
| <b>PFS of patients with ECOG = 1</b> |       |       |       |       |   |   |               |
| Treatment                            | Rank1 | Rank2 | Rank3 | -     | - | - | SUCRA         |
| IC                                   | 0.04  | 0.96  | 0.00  | -     | - | - | 0.5207        |
| BC                                   | 0.96  | 0.04  | 0.00  | -     | - | - | <b>0.9783</b> |
| BIC                                  | -     | -     | -     | -     | - | - | -             |
| DIC                                  | -     | -     | -     | -     | - | - | -             |
| DI                                   | -     | -     | -     | -     | - | - | -             |
| CT                                   | 0.00  | 0.00  | 1.00  | -     | - | - | 0.0010        |
| <b>OS of smokers</b>                 |       |       |       |       |   |   |               |
| Treatment                            | Rank1 | Rank2 | Rank3 | Rank4 | - | - | SUCRA         |
| IC                                   | 0.22  | 0.21  | 0.46  | 0.11  | - | - | 0.5145        |
| BC                                   | 0.09  | 0.53  | 0.27  | 0.11  | - | - | 0.5287        |
| BIC                                  | 0.68  | 0.20  | 0.08  | 0.04  | - | - | <b>0.8407</b> |
| DIC                                  | -     | -     | -     | -     | - | - | -             |
| DI                                   | -     | -     | -     | -     | - | - | -             |
| CT                                   | 0.01  | 0.07  | 0.19  | 0.73  | - | - | 0.1162        |

| <b>PFS of smokers</b>                                 |       |       |       |       |   |   |               |
|-------------------------------------------------------|-------|-------|-------|-------|---|---|---------------|
| Treatment                                             | Rank1 | Rank2 | Rank3 | -     | - | - | SUCRA         |
| IC                                                    | 0.31  | 0.69  | 0.00  | -     | - | - | 0.6526        |
| BC                                                    | 0.69  | 0.30  | 0.01  | -     | - | - | <b>0.8443</b> |
| BIC                                                   | -     | -     | -     | -     | - | - | -             |
| DIC                                                   | -     | -     | -     | -     | - | - | -             |
| DI                                                    | -     | -     | -     | -     | - | - | -             |
| CT                                                    | 0.00  | 0.01  | 0.99  | -     | - | - | 0.0032        |
| <b>OS of non-smokers</b>                              |       |       |       |       |   |   |               |
| Treatment                                             | Rank1 | Rank2 | Rank3 | Rank4 | - | - | SUCRA         |
| IC                                                    | 0.32  | 0.21  | 0.35  | 0.11  | - | - | 0.5830        |
| BC                                                    | 0.11  | 0.47  | 0.37  | 0.05  | - | - | 0.5479        |
| BIC                                                   | 0.56  | 0.28  | 0.11  | 0.05  | - | - | <b>0.7830</b> |
| DIC                                                   | -     | -     | -     | -     | - | - | -             |
| DI                                                    | -     | -     | -     | -     | - | - | -             |
| CT                                                    | 0.01  | 0.04  | 0.16  | 0.79  | - | - | 0.0860        |
| <b>PFS of non-smokers</b>                             |       |       |       |       |   |   |               |
| Treatment                                             | Rank1 | Rank2 | Rank3 | -     | - | - | SUCRA         |
| IC                                                    | 0.09  | 0.88  | 0.03  | -     | - | - | 0.5262        |
| BC                                                    | 0.91  | 0.08  | 0.00  | -     | - | - | <b>0.9522</b> |
| BIC                                                   | -     | -     | -     | -     | - | - | -             |
| DIC                                                   | -     | -     | -     | -     | - | - | -             |
| DI                                                    | -     | -     | -     | -     | - | - | -             |
| CT                                                    | 0.00  | 0.04  | 0.96  | -     | - | - | 0.0216        |
| <b>OS of patients <math>\geq 65</math> years old</b>  |       |       |       |       |   |   |               |
| Treatment                                             | Rank1 | Rank2 | Rank3 | -     | - | - | SUCRA         |
| IC                                                    | 0.44  | 0.43  | 0.13  | -     | - | - | 0.6569        |
| BC                                                    | 0.54  | 0.39  | 0.06  | -     | - | - | <b>0.7396</b> |
| BIC                                                   | -     | -     | -     | -     | - | - | -             |
| DIC                                                   | -     | -     | -     | -     | - | - | -             |
| DI                                                    | -     | -     | -     | -     | - | - | -             |
| CT                                                    | 0.01  | 0.18  | 0.81  | -     | - | - | 0.1035        |
| <b>PFS of patients <math>\geq 65</math> years old</b> |       |       |       |       |   |   |               |
| Treatment                                             | Rank1 | Rank2 | Rank3 | -     | - | - | SUCRA         |
| IC                                                    | 0.44  | 0.43  | 0.13  | -     | - | - | 0.6538        |
| BC                                                    | 0.55  | 0.39  | 0.06  | -     | - | - | <b>0.7434</b> |
| BIC                                                   | -     | -     | -     | -     | - | - | -             |
| DIC                                                   | -     | -     | -     | -     | - | - | -             |
| DI                                                    | -     | -     | -     | -     | - | - | -             |
| CT                                                    | 0.01  | 0.18  | 0.81  | -     | - | - | 0.1028        |
| <b>OS of patients <math>&lt; 65</math> years old</b>  |       |       |       |       |   |   |               |
| Treatment                                             | Rank1 | Rank2 | Rank3 | Rank4 | - | - | SUCRA         |

|                                          |       |       |       |       |   |   |               |
|------------------------------------------|-------|-------|-------|-------|---|---|---------------|
| IC                                       | 0.24  | 0.23  | 0.33  | 0.20  | - | - | 0.5034        |
| BC                                       | 0.12  | 0.50  | 0.33  | 0.06  | - | - | 0.5591        |
| BIC                                      | 0.64  | 0.21  | 0.09  | 0.07  | - | - | <b>0.8067</b> |
| DIC                                      | -     | -     | -     | -     | - | - | -             |
| DI                                       | -     | -     | -     | -     | - | - | -             |
| CT                                       | 0.01  | 0.05  | 0.25  | 0.68  | - | - | 0.1308        |
| <b>PFS of patients &lt; 65 years old</b> |       |       |       |       |   |   |               |
| Treatment                                | Rank1 | Rank2 | Rank3 | -     | - | - | SUCRA         |
| IC                                       | 0.02  | 0.98  | 0.00  | -     | - | - | 0.5076        |
| BC                                       | 0.98  | 0.02  | 0.00  | -     | - | - | <b>0.9912</b> |
| BIC                                      | -     | -     | -     | -     | - | - | -             |
| DIC                                      | -     | -     | -     | -     | - | - | -             |
| DI                                       | -     | -     | -     | -     | - | - | -             |
| CT                                       | 0.00  | 0.00  | 1.00  | -     | - | - | 0.0012        |
| <b>OS of male patients</b>               |       |       |       |       |   |   |               |
| Treatment                                | Rank1 | Rank2 | Rank3 | Rank4 | - | - | SUCRA         |
| IC                                       | 0.07  | 0.13  | 0.55  | 0.25  | - | - | 0.3398        |
| BC                                       | 0.08  | 0.75  | 0.15  | 0.01  | - | - | 0.6352        |
| BIC                                      | 0.85  | 0.10  | 0.03  | 0.01  | - | - | <b>0.9269</b> |
| DIC                                      | -     | -     | -     | -     | - | - | -             |
| DI                                       | -     | -     | -     | -     | - | - | -             |
| CT                                       | 0.00  | 0.01  | 0.26  | 0.72  | - | - | 0.0981        |
| <b>PFS of male patients</b>              |       |       |       |       |   |   |               |
| Treatment                                | Rank1 | Rank2 | Rank3 | -     | - | - | SUCRA         |
| IC                                       | 0.10  | 0.90  | 0.00  | -     | - | - | 0.5470        |
| BC                                       | 0.90  | 0.09  | 0.00  | -     | - | - | <b>0.9502</b> |
| BIC                                      | -     | -     | -     | -     | - | - | -             |
| DIC                                      | -     | -     | -     | -     | - | - | -             |
| DI                                       | -     | -     | -     | -     | - | - | -             |
| CT                                       | 0.00  | 0.01  | 0.99  | -     | - | - | 0.0028        |
| <b>OS of female patients</b>             |       |       |       |       |   |   |               |
| Treatment                                | Rank1 | Rank2 | Rank3 | Rank4 | - | - | SUCRA         |
| IC                                       | 0.53  | 0.24  | 0.16  | 0.08  | - | - | <b>0.7356</b> |
| BC                                       | 0.07  | 0.31  | 0.48  | 0.13  | - | - | 0.4398        |
| BIC                                      | 0.39  | 0.36  | 0.13  | 0.12  | - | - | 0.6748        |
| DIC                                      | -     | -     | -     | -     | - | - | -             |
| DI                                       | -     | -     | -     | -     | - | - | -             |
| CT                                       | 0.01  | 0.09  | 0.23  | 0.66  | - | - | 0.1497        |
| <b>PFS of female patients</b>            |       |       |       |       |   |   |               |
| Treatment                                | Rank1 | Rank2 | Rank3 | -     | - | - | SUCRA         |
| IC                                       | 0.16  | 0.84  | 0.00  | -     | - | - | 0.5799        |
| BC                                       | 0.84  | 0.16  | 0.00  | -     | - | - | <b>0.9177</b> |

|                                              |        |        |       |   |   |   |               |
|----------------------------------------------|--------|--------|-------|---|---|---|---------------|
| BIC                                          | -      | -      | -     | - | - | - | -             |
| DIC                                          | -      | -      | -     | - | - | - | -             |
| DI                                           | -      | -      | -     | - | - | - | -             |
| CT                                           | 0.00   | 0.00   | 1.00  | - | - | - | 0.0023        |
| <b>OS of patients with liver metastases</b>  |        |        |       |   |   |   |               |
| Treatment                                    | Rank1  | Rank2  | Rank3 | - | - | - | SUCRA         |
| IC                                           | 0.32   | 0.52   | 0.17  | - | - | - | 0.5754        |
| BC                                           | 0.66   | 0.25   | 0.09  | - | - | - | <b>0.7869</b> |
| BIC                                          | -      | -      | -     | - | - | - | -             |
| DIC                                          | -      | -      | -     | - | - | - | -             |
| DI                                           | -      | -      | -     | - | - | - | -             |
| CT                                           | 0.02   | 0.23   | 0.75  | - | - | - | 0.1377        |
| <b>PFS of patients with liver metastases</b> |        |        |       |   |   |   |               |
| Treatment                                    | Rank1  | Rank2  | -     | - | - | - | SUCRA         |
| IC                                           | 0.9569 | 0.0431 | -     | - | - | - | 0.9569        |
| BC                                           | -      | -      | -     | - | - | - | -             |
| BIC                                          | -      | -      | -     | - | - | - | -             |
| DIC                                          | -      | -      | -     | - | - | - | -             |
| DI                                           | -      | -      | -     | - | - | - | -             |
| CT                                           | 0.0431 | 0.9569 | 1-    | - | - | - | 0.0431        |

**Abbreviations:** NSCLC, non-small cell lung cancer, PFS, progression-free survival; OS, overall survival; SUCRA, surface under the cumulative ranking curve.
