# Supplementary material for: Combined Immunotherapy with Chemotherapy versus Bevacizumab with Chemotherapy in First-Line Treatment of Driver-Gene-Negative Non-Squamous Non-Small Cell Lung Cancer: An Updated Systematic Review and Network Meta-Analysis
Source: MDPI journal article supplement (doi:10.3390/jcm11061655), 2022-03-16
Supplement: s1 [file s1]

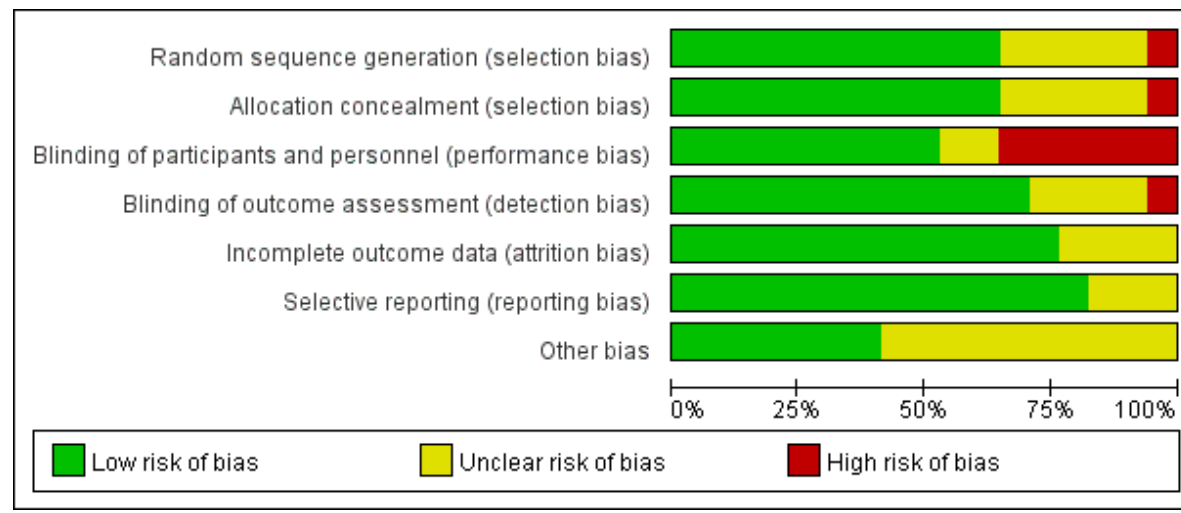

**Supplemental Figure S1:** Quality assessment: risk of bias according to Cochrane Collaboration's tool

|               | Random sequence generation (selection bias) | Allocation concealment (selection bias) | Blinding of participants and personnel (performance bias) | Blinding of outcome assessment (detection bias) | Incomplete outcome data (attrition bias) | Selective reporting (reporting bias) | Other bias |
|---------------|---------------------------------------------|-----------------------------------------|-----------------------------------------------------------|-------------------------------------------------|------------------------------------------|--------------------------------------|------------|
| AVAIL         | +                                           | +                                       | +                                                         | +                                               | +                                        | +                                    | +          |
| BEYOND        | +                                           | +                                       | +                                                         | ?                                               | +                                        | +                                    | +          |
| Camel         | ?                                           | ?                                       | -                                                         | +                                               | ?                                        | +                                    | ?          |
| CheckMate 227 | ?                                           | ?                                       | -                                                         | +                                               | +                                        | +                                    | +          |
| CheckMate 9LA | ?                                           | ?                                       | -                                                         | +                                               | ?                                        | +                                    | ?          |
| ECOG4599      | ?                                           | ?                                       | -                                                         | ?                                               | +                                        | +                                    | +          |
| ERACLE        | +                                           | +                                       | ?                                                         | ?                                               | +                                        | +                                    | ?          |
| GEMSTONE-302  | +                                           | +                                       | +                                                         | +                                               | ?                                        | ?                                    | ?          |
| IMpower130    | +                                           | +                                       | +                                                         | +                                               | +                                        | +                                    | ?          |
| IMpower132    | -                                           | -                                       | ?                                                         | -                                               | ?                                        | ?                                    | ?          |
| IMpower150    | +                                           | +                                       | +                                                         | +                                               | +                                        | +                                    | ?          |
| JO19907       | +                                           | +                                       | -                                                         | +                                               | +                                        | +                                    | ?          |
| KEYNOTE-021G  | +                                           | +                                       | +                                                         | +                                               | +                                        | +                                    | ?          |
| KEYNOTE-189   | +                                           | +                                       | +                                                         | +                                               | +                                        | +                                    | ?          |
| ORIENT 11     | +                                           | +                                       | +                                                         | +                                               | +                                        | ?                                    | +          |
| PRONOUNCE     | ?                                           | ?                                       | +                                                         | ?                                               | +                                        | +                                    | +          |
| RATIONALE 304 | +                                           | +                                       | -                                                         | +                                               | +                                        | +                                    | +          |
