# Supplementary material for: Combined Immunotherapy with Chemotherapy versus Bevacizumab with Chemotherapy in First-Line Treatment of Driver-Gene-Negative Non-Squamous Non-Small Cell Lung Cancer: An Updated Systematic Review and Network Meta-Analysis
Source: MDPI journal article supplement (doi:10.3390/jcm11061655), 2022-03-16
Supplement: s1 [file s1]

**Supplemental Table S2:** Rank probabilities with SUCRA value for different outcomes in 6 kinds of first-line treatments for patients with non-squamous NSCLC.

|                  |       |       |       |       |       |       |               |
|------------------|-------|-------|-------|-------|-------|-------|---------------|
| <b>OS</b>        |       |       |       |       |       |       |               |
| Treatment        | Rank1 | Rank2 | Rank3 | Rank4 | Rank5 | Rank6 | SUCRA         |
| IC               | 0.14  | 0.38  | 0.37  | 0.11  | 0.00  | 0.00  | 0.7079        |
| BC               | 0.00  | 0.00  | 0.04  | 0.27  | 0.62  | 0.06  | 0.2615        |
| BIC              | 0.33  | 0.29  | 0.22  | 0.12  | 0.02  | 0.01  | 0.7506        |
| DIC              | 0.44  | 0.20  | 0.18  | 0.12  | 0.04  | 0.02  | <b>0.7641</b> |
| DI               | 0.09  | 0.13  | 0.18  | 0.35  | 0.16  | 0.09  | 0.4766        |
| CT               | 0.00  | 0.00  | 0.00  | 0.02  | 0.16  | 0.82  | 0.0394        |
| <b>PFS</b>       |       |       |       |       |       |       |               |
| Treatment        | Rank1 | Rank2 | Rank3 | Rank4 | Rank5 | Rank6 | SUCRA         |
| IC               | 0.27  | 0.59  | 0.13  | 0.01  | 0.00  | 0.00  | 0.8248        |
| BC               | 0.00  | 0.00  | 0.13  | 0.41  | 0.40  | 0.05  | 0.3286        |
| BIC              | 0.63  | 0.22  | 0.10  | 0.03  | 0.00  | 0.00  | <b>0.8851</b> |
| DIC              | 0.07  | 0.12  | 0.40  | 0.21  | 0.12  | 0.07  | 0.5216        |
| DI               | 0.03  | 0.06  | 0.23  | 0.29  | 0.23  | 0.16  | 0.3732        |
| CT               | 0.00  | 0.00  | 0.00  | 0.04  | 0.25  | 0.71  | 0.0666        |
| <b>ORR</b>       |       |       |       |       |       |       |               |
| Treatment        | Rank1 | Rank2 | Rank3 | Rank4 | Rank5 | Rank6 | SUCRA         |
| IC               | 0.03  | 0.29  | 0.45  | 0.22  | 0.01  | 0.00  | 0.6250        |
| BC               | 0.00  | 0.45  | 0.37  | 0.16  | 0.00  | 0.00  | 0.6590        |
| BIC              | 0.91  | 0.07  | 0.02  | 0.00  | 0.00  | 0.00  | <b>0.9760</b> |
| DIC              | 0.05  | 0.18  | 0.15  | 0.49  | 0.12  | 0.00  | 0.5020        |
| DI               | 0.00  | 0.01  | 0.01  | 0.12  | 0.62  | 0.23  | 0.1880        |
| CT               | 0.00  | 0.00  | 0.00  | 0.00  | 0.24  | 0.75  | 0.0510        |
| <b>≥ 3 TRAEs</b> |       |       |       |       |       |       |               |
| Treatment        | Rank1 | Rank2 | Rank3 | -     | -     | -     | SUCRA         |
| IC               | 0.27  | 0.71  | 0.02  | -     | -     | -     | 0.6230        |
| BC               | 0.73  | 0.26  | 0.01  | -     | -     | -     | <b>0.8600</b> |
| BIC              | -     | -     | -     | -     | -     | -     | -             |
| DIC              | -     | -     | -     | -     | -     | -     | -             |
| DI               | -     | -     | -     | -     | -     | -     | -             |
| CT               | 0.00  | 0.03  | 0.96  | -     | -     | -     | 0.0017        |

**Abbreviations:** NSCLC, non-small cell lung cancer, ORR, objective response rate; PFS, progression-free survival; OS, overall survival; TRAE: treatment-related adverse event (grade3-5); SUCRA, surface under the cumulative ranking curve.
