# Supplementary material for: Combined Immunotherapy with Chemotherapy versus Bevacizumab with Chemotherapy in First-Line Treatment of Driver-Gene-Negative Non-Squamous Non-Small Cell Lung Cancer: An Updated Systematic Review and Network Meta-Analysis
Source: MDPI journal article supplement (doi:10.3390/jcm11061655), 2022-03-16
Supplement: s1 [file s1]

Supplemental Table S1. Search Strategy

|                                         |                                       |                                                                                                                                                                                                                                                                                                                                                                                                                                                                                                                                                                                                                                                                                                                                                                                                                                                                                                                                                                                                                                                                                                                                                                                                                                                                                                                                                                                                                                                                                                                                                                                                                                                                                        |
|-----------------------------------------|---------------------------------------|----------------------------------------------------------------------------------------------------------------------------------------------------------------------------------------------------------------------------------------------------------------------------------------------------------------------------------------------------------------------------------------------------------------------------------------------------------------------------------------------------------------------------------------------------------------------------------------------------------------------------------------------------------------------------------------------------------------------------------------------------------------------------------------------------------------------------------------------------------------------------------------------------------------------------------------------------------------------------------------------------------------------------------------------------------------------------------------------------------------------------------------------------------------------------------------------------------------------------------------------------------------------------------------------------------------------------------------------------------------------------------------------------------------------------------------------------------------------------------------------------------------------------------------------------------------------------------------------------------------------------------------------------------------------------------------|
| Non-squamous non small cell lung cancer | #1                                    | ((("non-squamous"[Title/Abstract]) AND "lung cancer"[Title/Abstract]) AND (((((NSCLC[Title/Abstract]) OR "Non Small Cell"[Title/Abstract]) OR "Non-Small-Cell"[Title/Abstract]) OR "Non-Small Cell"[Title/Abstract])))) OR "Carcinoma, Non-Small-Cell Lung"[Mesh])                                                                                                                                                                                                                                                                                                                                                                                                                                                                                                                                                                                                                                                                                                                                                                                                                                                                                                                                                                                                                                                                                                                                                                                                                                                                                                                                                                                                                     |
| Immunotherapy                           | #2                                    | ((("pembrolizumab" [Supplementary Concept] OR "lambrolizumab" [Title/Abstract] OR "Keytruda" [Title/Abstract] OR "MK-3475" [Title/Abstract] OR "nivolumab" [Supplementary Concept] OR "MDX-1106" [Title/Abstract] OR "ONO-4538" [Title/Abstract] OR "BMS-936558" [Title/Abstract] OR "Opdivo"[Title/Abstract] OR "atezolizumab"[Supplementary Concept] OR "MPDL3280A"[Title/Abstract] OR "Tecentriq"[Title/Abstract] OR "RG7446"[Title/Abstract] OR "RG-7446"[Title/Abstract] OR "Durvalumab" [Title/Abstract] OR "Imfinzi" [Title/Abstract] OR "MEDI4736" [Title/Abstract] OR "Camrelizumab" [Title/Abstract] OR "SHR-1210" [Title/Abstract] OR "Tislelizumab" [Title/Abstract] OR "BGB-A317"[Title/Abstract] OR "Sintilimab" [Title/Abstract] OR "anti-PDL1"[Title/Abstract] OR "anti-PD1"[Title/Abstract] OR "PD-1"[Title/Abstract] OR "PD-L1"[Title/Abstract] OR "Programmed Death 1"[Title/Abstract] OR "Programmed Cell Death 1 Receptor"[Title/Abstract] OR "Programmed Death-Ligand 1"[Title/Abstract] OR "programmed cell death 1 ligand 1 protein"[Title/Abstract] OR "immune checkpoint inhibitor"[Title/Abstract] OR "immune therapy"[Title/Abstract] OR "immunotherapy"[Title/Abstract])) OR ("CTLA 4 Antigen" [Title/Abstract] OR "Cytotoxic T Lymphocyte Associated Antigen 4" [Title/Abstract] OR "CD152 Antigen*" [Title/Abstract] OR "CTLA-4 Protein" [Title/Abstract] OR "Cytotoxic T Lymphocyte Antigen 4" [Title/Abstract] OR Nivolumab[Title/Abstract] OR ONO-4538[Title/Abstract] OR MDX-1106[Title/Abstract] OR BMS-936558[Title/Abstract] OR Ipilimumab[Title/Abstract] OR MDX-010[Title/Abstract] OR Tremelimumab[Title/Abstract] OR CP-675[Title/Abstract]) |
| Angiogenesis Inhibitors                 | #3                                    | ((("Bevacizumab"[Title/Abstract] OR "Avastin"[Title/Abstract])) OR "Endostatins" [Title/Abstract] OR ("Anlotinib" [Title/Abstract] OR "AL3818" [Title/Abstract]) OR "Nintedanib esylate"[Title/Abstract] OR "Ofev" [Title/Abstract] OR "nintedanib"[Title/Abstract] OR "Vargatef" [Title/Abstract] OR "BIBF 1120" [Title/Abstract] OR "BIBF-1120" [Title/Abstract] OR "Angiogenesis Inhibitor*")                                                                                                                                                                                                                                                                                                                                                                                                                                                                                                                                                                                                                                                                                                                                                                                                                                                                                                                                                                                                                                                                                                                                                                                                                                                                                       |
| Type of Trials                          | #4                                    | ((("clinical trials as topic"[MeSH Terms] OR "Randomized clinical trial"[Title/Abstract] OR phase[Title/Abstract]))                                                                                                                                                                                                                                                                                                                                                                                                                                                                                                                                                                                                                                                                                                                                                                                                                                                                                                                                                                                                                                                                                                                                                                                                                                                                                                                                                                                                                                                                                                                                                                    |
| Date of publication                     | #5                                    | 2000/01/01:2021/12/31[Date - Publication]                                                                                                                                                                                                                                                                                                                                                                                                                                                                                                                                                                                                                                                                                                                                                                                                                                                                                                                                                                                                                                                                                                                                                                                                                                                                                                                                                                                                                                                                                                                                                                                                                                              |
| Language                                | #6                                    | "English"[Language]                                                                                                                                                                                                                                                                                                                                                                                                                                                                                                                                                                                                                                                                                                                                                                                                                                                                                                                                                                                                                                                                                                                                                                                                                                                                                                                                                                                                                                                                                                                                                                                                                                                                    |
| Search strategy                         | #1 AND(#2 OR #3) AND #4 AND #5 AND #6 |                                                                                                                                                                                                                                                                                                                                                                                                                                                                                                                                                                                                                                                                                                                                                                                                                                                                                                                                                                                                                                                                                                                                                                                                                                                                                                                                                                                                                                                                                                                                                                                                                                                                                        |
