# Supplementary figures and images for: Combined Immunotherapy with Chemotherapy versus Bevacizumab with Chemotherapy in First-Line Treatment of Driver-Gene-Negative Non-Squamous Non-Small Cell Lung Cancer: An Updated Systematic Review and Network Meta-Analysis
Source: MDPI journal article supplement (doi:10.3390/jcm11061655), 2022-03-16

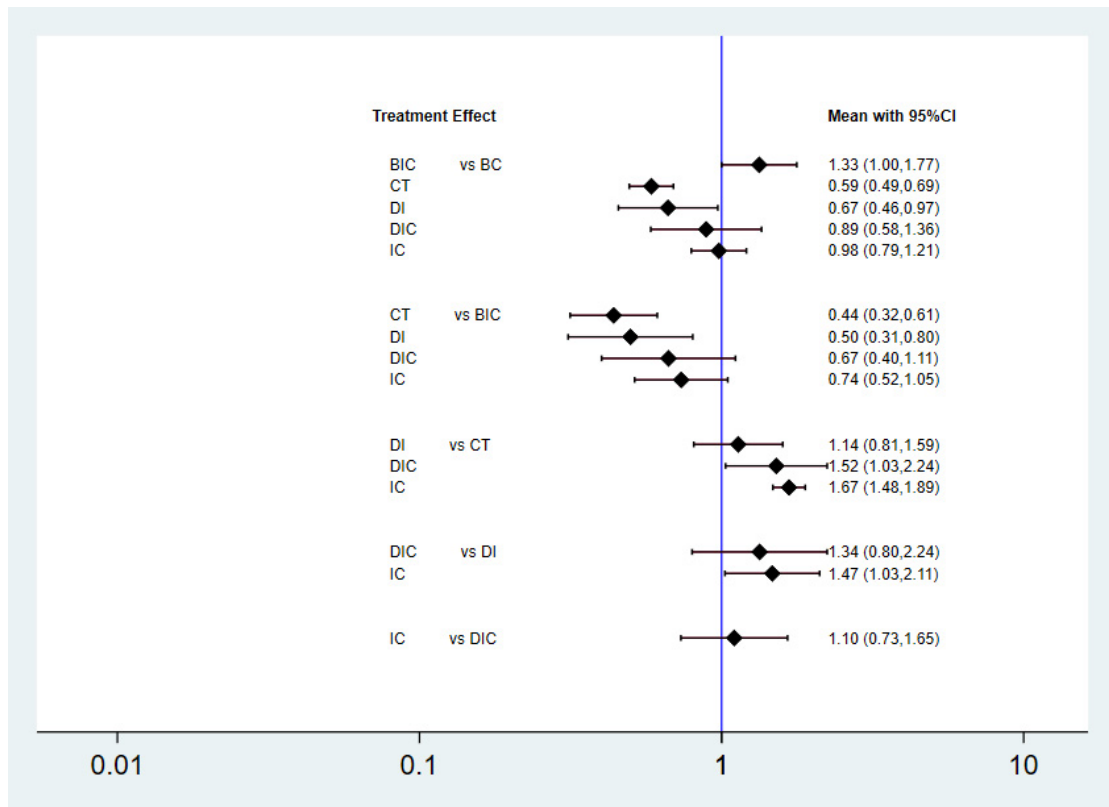

Supplemental Figure S4. Forest plot of risk ratios (RRs) for ORR in NMA.

Supplement: s1 [file s1]

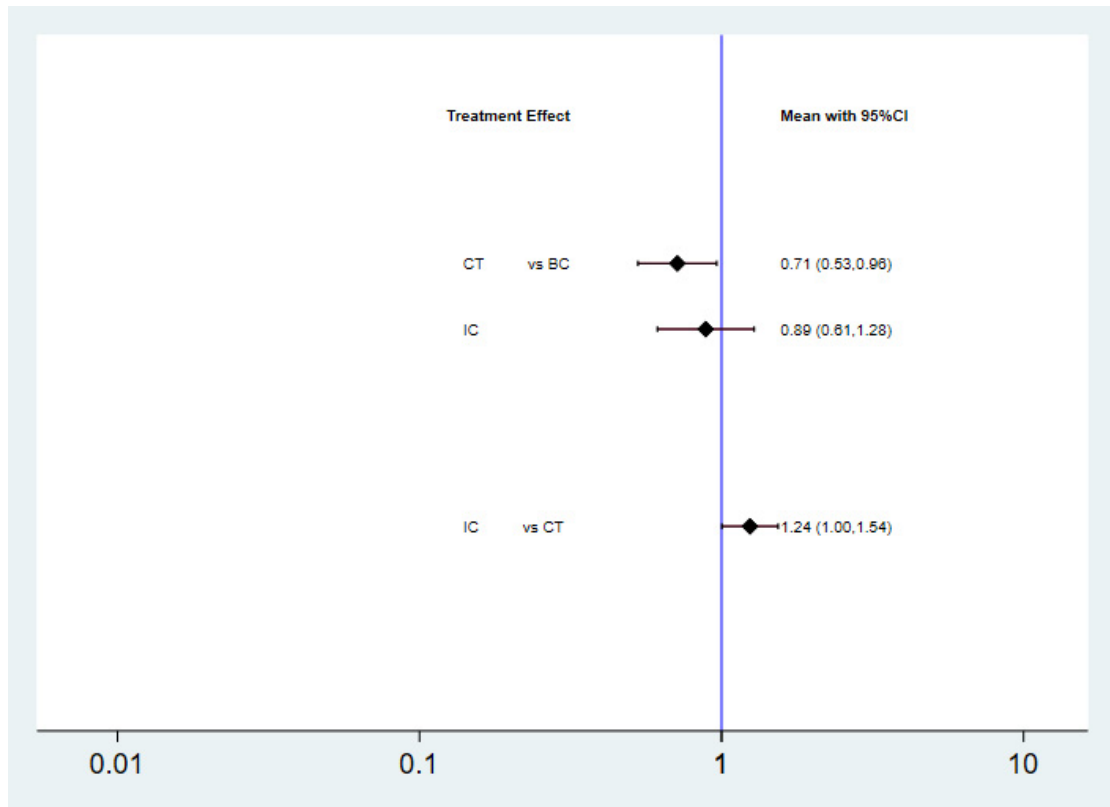

Supplemental Figure S5. Forest plot of risk ratios (RRs) for  $\geq 3$  TRAEs in NMA.

Supplement: s1 [file s1]
